# Supplementary material for: Characteristics of Resting State EEG Power in 80+-Year-Olds of Different Cognitive Status
Source: PubMed Central journal article supplement (PMC8387136; doi:10.3389/fnagi.2021.675689), 2021-08-11
Supplement: Data_Sheet_1.pdf [file Data_Sheet_1.pdf]

## *Supplementary Material*

**Supplementary Table 1.** Log-transformed EC and EO rest absolute power in delta band (1 – 3.5 Hz) as M (SD) for each ROI and group.

|    |           | CHI            |                |                | pMCI           |                |                | naMCI          |                |                | aMCI           |                |                |
|----|-----------|----------------|----------------|----------------|----------------|----------------|----------------|----------------|----------------|----------------|----------------|----------------|----------------|
|    |           | Left           | Mid            | Right          | Left           | Mid            | Right          | Left           | Mid            | Right          | Left           | Mid            | Right          |
| EC | Frontal   | 0.74<br>(0.31) | 0.24<br>(0.28) | 0.72<br>(0.32) | 0.71<br>(0.33) | 0.25<br>(0.27) | 0.73<br>(0.36) | 0.66<br>(0.33) | 0.27<br>(0.34) | 0.65<br>(0.35) | 0.79<br>(0.34) | 0.28<br>(0.29) | 0.76<br>(0.37) |
|    | Central   | 0.33<br>(0.26) | 0.17<br>(0.31) | 0.31<br>(0.25) | 0.36<br>(0.28) | 0.16<br>(0.31) | 0.36<br>(0.37) | 0.24<br>(0.28) | 0.15<br>(0.28) | 0.24<br>(0.28) | 0.41<br>(0.33) | 0.25<br>(0.34) | 0.34<br>(0.35) |
|    | Posterior | 0.39<br>(0.25) | 0.25<br>(0.27) | 0.37<br>(0.25) | 0.42<br>(0.25) | 0.31<br>(0.29) | 0.41<br>(0.24) | 0.38<br>(0.28) | 0.30<br>(0.29) | 0.37<br>(0.26) | 0.46<br>(0.29) | 0.33<br>(0.30) | 0.46<br>(0.32) |
| EO | Frontal   | 0.45<br>(0.29) | 0.15<br>(0.31) | 0.43<br>(0.25) | 0.47<br>(0.30) | 0.17<br>(0.27) | 0.48<br>(0.26) | 0.50<br>(0.32) | 0.18<br>(0.17) | 0.52<br>(0.33) | 0.61<br>(0.41) | 0.22<br>(0.29) | 0.58<br>(0.37) |
|    | Central   | 0.27<br>(0.24) | 0.13<br>(0.29) | 0.28<br>(0.24) | 0.31<br>(0.26) | 0.11<br>(0.28) | 0.29<br>(0.27) | 0.29<br>(0.26) | 0.08<br>(0.20) | 0.24<br>(0.26) | 0.40<br>(0.38) | 0.25<br>(0.37) | 0.37<br>(0.39) |
|    | Posterior | 0.30<br>(0.25) | 0.19<br>(0.29) | 0.27<br>(0.22) | 0.33<br>(0.19) | 0.23<br>(0.29) | 0.33<br>(0.23) | 0.34<br>(0.29) | 0.26<br>(0.25) | 0.33<br>(0.25) | 0.44<br>(0.31) | 0.27<br>(0.31) | 0.43<br>(0.34) |

*Note.* CHI = cognitively healthy individuals, pMCI = possible mild cognitive impairments, naMCI = non-amnestic mild cognitive impairments, aMCI = amnestic mild cognitive impairments. EC = eyes closed, EO = eyes open.

**Supplementary Table 2.** Log-transformed EC and EO rest absolute power in theta band (4 – 7.5 Hz) as M (SD) for each ROI and group.

|    |           | CHI            |                 |                | pMCI           |                 |                | naMCI          |                 |                 | aMCI           |                 |                |
|----|-----------|----------------|-----------------|----------------|----------------|-----------------|----------------|----------------|-----------------|-----------------|----------------|-----------------|----------------|
|    |           | Left           | Mid             | Right          | Left           | Mid             | Right          | Left           | Mid             | Right           | Left           | Mid             | Right          |
| EC | Frontal   | 0.33<br>(0.32) | 0.13<br>(0.39)  | 0.32<br>(0.33) | 0.30<br>(0.28) | 0.13<br>(0.33)  | 0.31<br>(0.26) | 0.22<br>(0.22) | 0.17<br>(0.27)  | 0.22<br>(0.24)  | 0.34<br>(0.29) | 0.14<br>(0.34)  | 0.32<br>(0.30) |
|    | Central   | 0.12<br>(0.35) | -0.03<br>(0.32) | 0.13<br>(0.35) | 0.14<br>(0.28) | 0.03<br>(0.36)  | 0.18<br>(0.37) | 0.06<br>(0.30) | 0.01<br>(0.24)  | 0.07<br>(0.27)  | 0.18<br>(0.33) | 0.06<br>(0.34)  | 0.19<br>(0.36) |
|    | Posterior | 0.31<br>(0.38) | 0.08<br>(0.42)  | 0.29<br>(0.40) | 0.35<br>(0.34) | 0.12<br>(0.37)  | 0.34<br>(0.37) | 0.31<br>(0.34) | 0.07<br>(0.24)  | 0.29<br>(0.33)  | 0.35<br>(0.34) | 0.08<br>(0.34)  | 0.36<br>(0.36) |
| EO | Frontal   | 0.06<br>(0.27) | -0.06<br>(0.30) | 0.07<br>(0.26) | 0.09<br>(0.26) | -0.03<br>(0.30) | 0.11<br>(0.24) | 0.12<br>(0.26) | 0.07<br>(0.24)  | 0.14<br>(0.28)  | 0.18<br>(0.34) | 0.01<br>(0.32)  | 0.15<br>(0.28) |
|    | Central   | 0.00<br>(0.28) | -0.18<br>(0.25) | 0.00<br>(0.29) | 0.02<br>(0.27) | -0.13<br>(0.31) | 0.01<br>(0.27) | 0.04<br>(0.31) | -0.11<br>(0.25) | -0.02<br>(0.26) | 0.08<br>(0.33) | -0.07<br>(0.31) | 0.05<br>(0.32) |
|    | Posterior | 0.12<br>(0.28) | -0.10<br>(0.32) | 0.07<br>(0.27) | 0.16<br>(0.25) | -0.07<br>(0.33) | 0.12<br>(0.28) | 0.19<br>(0.32) | -0.02<br>(0.31) | 0.11<br>(0.25)  | 0.19<br>(0.29) | -0.08<br>(0.33) | 0.16<br>(0.33) |

*Note.* CHI = cognitively healthy individuals, pMCI = possible mild cognitive impairments, naMCI = non-amnesic mild cognitive impairments, aMCI = amnesic mild cognitive impairments, EC = eyes closed, EO = eyes open.

**Supplementary Table 3.** Log-transformed EC and EO rest absolute power in alpha band (8 – 13 Hz) as M (SD) for each ROI and group.

|    |           | CHI            |                 |                | pMCI           |                |                | naMCI          |                |                | aMCI           |                |                |
|----|-----------|----------------|-----------------|----------------|----------------|----------------|----------------|----------------|----------------|----------------|----------------|----------------|----------------|
|    |           | Left           | Mid             | Right          | Left           | Mid            | Right          | Left           | Mid            | Right          | Left           | Mid            | Right          |
| EC | Frontal   | 0.63<br>(0.37) | 0.52<br>(0.43)  | 0.60<br>(0.38) | 0.66<br>(0.43) | 0.56<br>(0.51) | 0.66<br>(0.42) | 0.54<br>(0.39) | 0.48<br>(0.47) | 0.53<br>(0.38) | 0.69<br>(0.35) | 0.58<br>(0.43) | 0.66<br>(0.35) |
|    | Central   | 0.56<br>(0.37) | 0.32<br>(0.37)  | 0.56<br>(0.36) | 0.59<br>(0.35) | 0.36<br>(0.45) | 0.61<br>(0.41) | 0.45<br>(0.39) | 0.29<br>(0.41) | 0.46<br>(0.35) | 0.68<br>(0.31) | 0.46<br>(0.40) | 0.67<br>(0.35) |
|    | Posterior | 0.90<br>(0.44) | 0.63<br>(0.50)  | 0.94<br>(0.46) | 0.94<br>(0.51) | 0.68<br>(0.57) | 0.96<br>(0.54) | 0.80<br>(0.52) | 0.55<br>(0.48) | 0.82<br>(0.56) | 1.00<br>(0.44) | 0.66<br>(0.45) | 1.07<br>(0.46) |
| EO | Frontal   | 0.27<br>(0.35) | 0.08<br>(0.40)  | 0.26<br>(0.34) | 0.31<br>(0.33) | 0.17<br>(0.39) | 0.31<br>(0.33) | 0.27<br>(0.31) | 0.15<br>(0.35) | 0.27<br>(0.33) | 0.34<br>(0.34) | 0.14<br>(0.37) | 0.31<br>(0.32) |
|    | Central   | 0.38<br>(0.36) | -0.01<br>(0.33) | 0.34<br>(0.37) | 0.40<br>(0.34) | 0.08<br>(0.39) | 0.38<br>(0.37) | 0.34<br>(0.36) | 0.04<br>(0.35) | 0.29<br>(0.36) | 0.46<br>(0.36) | 0.10<br>(0.34) | 0.43<br>(0.36) |
|    | Posterior | 0.45<br>(0.38) | 0.18<br>(0.46)  | 0.42<br>(0.39) | 0.52<br>(0.38) | 0.25<br>(0.45) | 0.49<br>(0.40) | 0.46<br>(0.39) | 0.26<br>(0.42) | 0.39<br>(0.39) | 0.54<br>(0.36) | 0.23<br>(0.40) | 0.53<br>(0.37) |

*Note.* CHI = cognitively healthy individuals, pMCI = possible mild cognitive impairments, naMCI = non-amnestic mild cognitive impairments, aMCI = amnestic mild cognitive impairments, EC = eyes closed, EO = eyes open.

**Supplementary Table 4.** Log-transformed EC and EO rest absolute power in beta band (13.5 – 24 Hz) as M (SD) for each ROI and group.

|    |           | CHI            |                |                | pMCI           |                |                | naMCI          |                |                | aMCI           |                |                |
|----|-----------|----------------|----------------|----------------|----------------|----------------|----------------|----------------|----------------|----------------|----------------|----------------|----------------|
|    |           | Left           | Mid            | Right          | Left           | Mid            | Right          | Left           | Mid            | Right          | Left           | Mid            | Right          |
| EC | Frontal   | 0.39<br>(0.25) | 0.25<br>(0.29) | 0.39<br>(0.26) | 0.37<br>(0.28) | 0.27<br>(0.32) | 0.42<br>(0.29) | 0.31<br>(0.29) | 0.24<br>(0.31) | 0.32<br>(0.31) | 0.43<br>(0.24) | 0.28<br>(0.28) | 0.45<br>(0.23) |
|    | Central   | 0.45<br>(0.30) | 0.20<br>(0.30) | 0.43<br>(0.29) | 0.45<br>(0.31) | 0.26<br>(0.38) | 0.44<br>(0.32) | 0.29<br>(0.30) | 0.23<br>(0.38) | 0.34<br>(0.32) | 0.48<br>(0.29) | 0.30<br>(0.31) | 0.47<br>(0.27) |
|    | Posterior | 0.51<br>(0.29) | 0.27<br>(0.31) | 0.51<br>(0.29) | 0.52<br>(0.30) | 0.30<br>(0.33) | 0.49<br>(0.31) | 0.40<br>(0.30) | 0.23<br>(0.30) | 0.40<br>(0.30) | 0.54<br>(0.27) | 0.30<br>(0.29) | 0.52<br>(0.27) |
| EO | Frontal   | 0.39<br>(0.26) | 0.19<br>(0.29) | 0.40<br>(0.29) | 0.40<br>(0.34) | 0.22<br>(0.33) | 0.42<br>(0.30) | 0.37<br>(0.24) | 0.23<br>(0.31) | 0.39<br>(0.30) | 0.43<br>(0.31) | 0.22<br>(0.28) | 0.45<br>(0.29) |
|    | Central   | 0.49<br>(0.30) | 0.12<br>(0.30) | 0.45<br>(0.28) | 0.43<br>(0.29) | 0.16<br>(0.39) | 0.43<br>(0.27) | 0.39<br>(0.32) | 0.18<br>(0.40) | 0.41<br>(0.36) | 0.45<br>(0.27) | 0.21<br>(0.33) | 0.46<br>(0.25) |
|    | Posterior | 0.48<br>(0.29) | 0.19<br>(0.31) | 0.45<br>(0.26) | 0.47<br>(0.28) | 0.22<br>(0.35) | 0.43<br>(0.29) | 0.41<br>(0.25) | 0.22<br>(0.29) | 0.35<br>(0.28) | 0.48<br>(0.25) | 0.22<br>(0.32) | 0.45<br>(0.23) |

*Note.* CHI = cognitively healthy individuals, pMCI = possible mild cognitive impairments, naMCI = non-amnesic mild cognitive impairments, aMCI = amnesic mild cognitive impairments, EC = eyes closed, EO = eyes open.

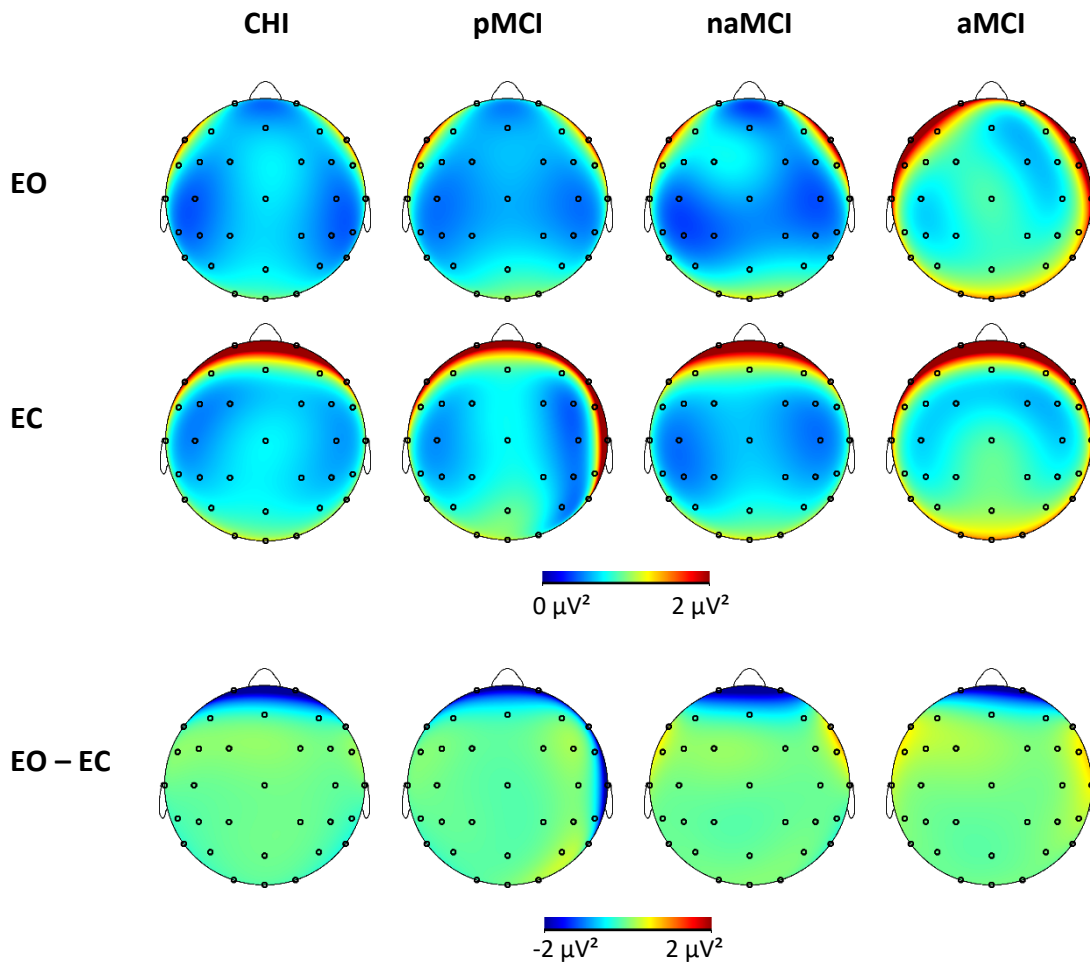

**Supplementary Figure 1.** Brain maps showing the mean absolute power in  $\mu V^2$  (non-transformed) for delta activity (1 – 3.5 Hz) in both conditions and the difference maps separately for each group. CHI = cognitively healthy individuals, pMCI = possible mild cognitive impairments, naMCI = non-amnesic mild cognitive impairments, aMCI = amnesic mild cognitive impairments, EC = eyes closed, EO = eyes open.

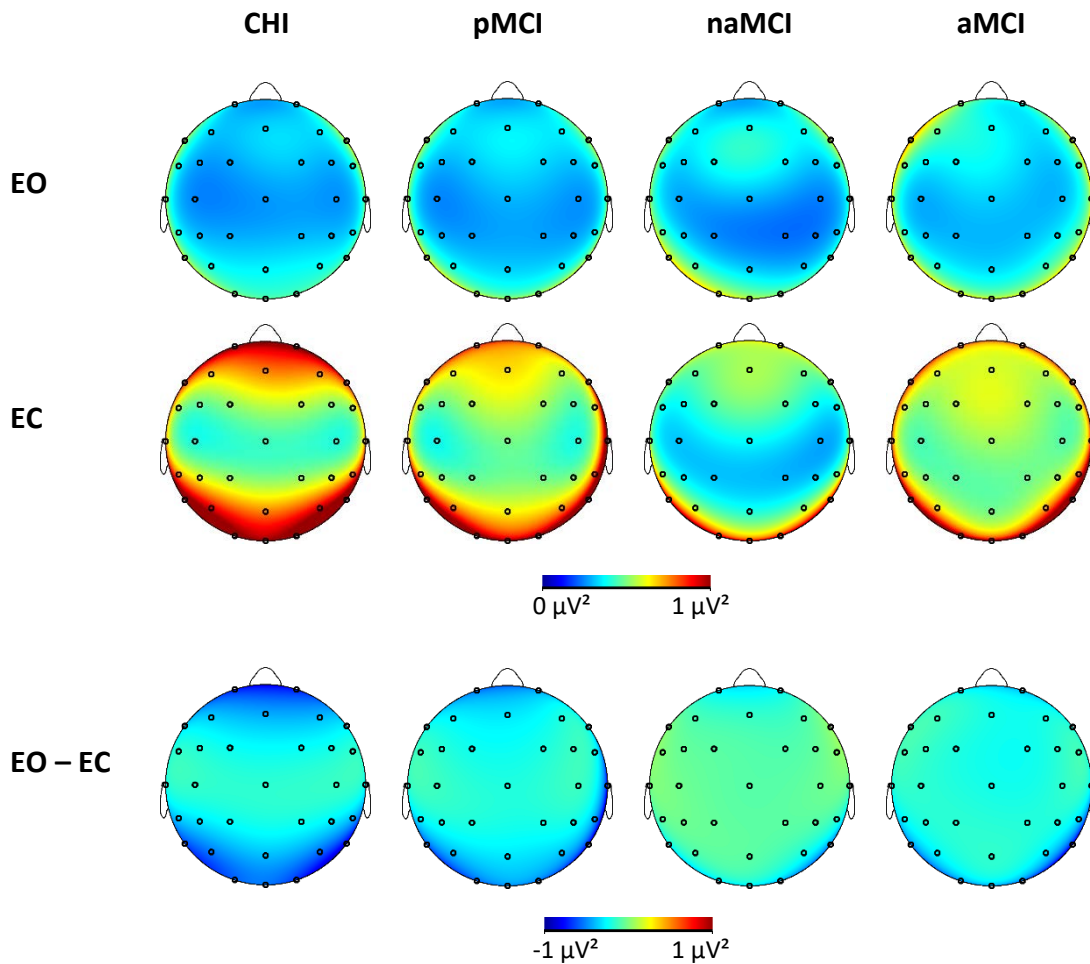

**Supplementary Figure 2.** Brain maps showing the mean absolute power in  $\mu\text{V}^2$  (non-transformed) for theta activity (4 – 7.5 Hz) in both conditions and the difference maps separately for each group. CHI = cognitively healthy individuals, pMCI = possible mild cognitive impairments, naMCI = non-amnesic mild cognitive impairments, aMCI = amnesic mild cognitive impairments, EC = eyes closed, EO = eyes open.

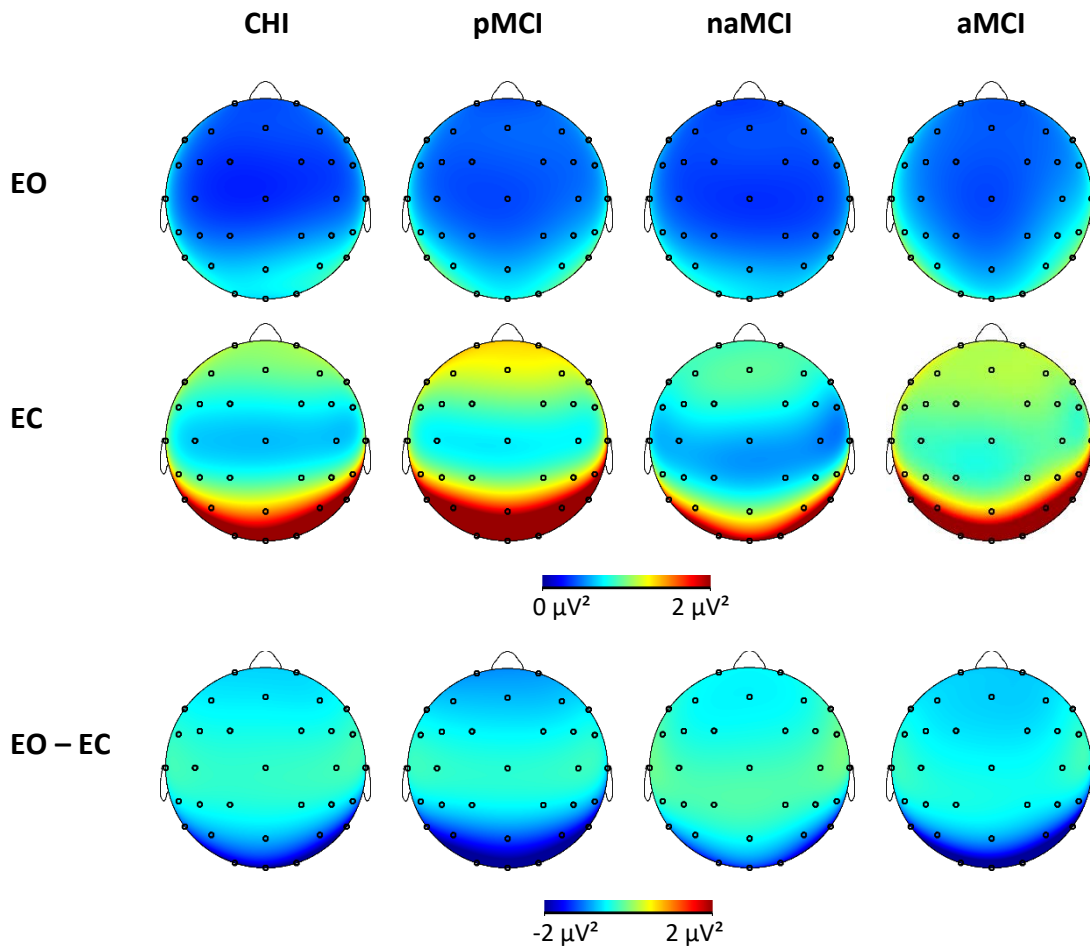

**Supplementary Figure 3.** Brain maps showing the mean absolute power in  $\mu V^2$  (non-transformed) for alpha activity (8 – 13 Hz) in both conditions and the difference maps separately for each group. CHI = cognitively healthy individuals, pMCI = possible mild cognitive impairments, naMCI = non-amnesic mild cognitive impairments, aMCI = amnesic mild cognitive impairments, EC = eyes closed, EO = eyes open.

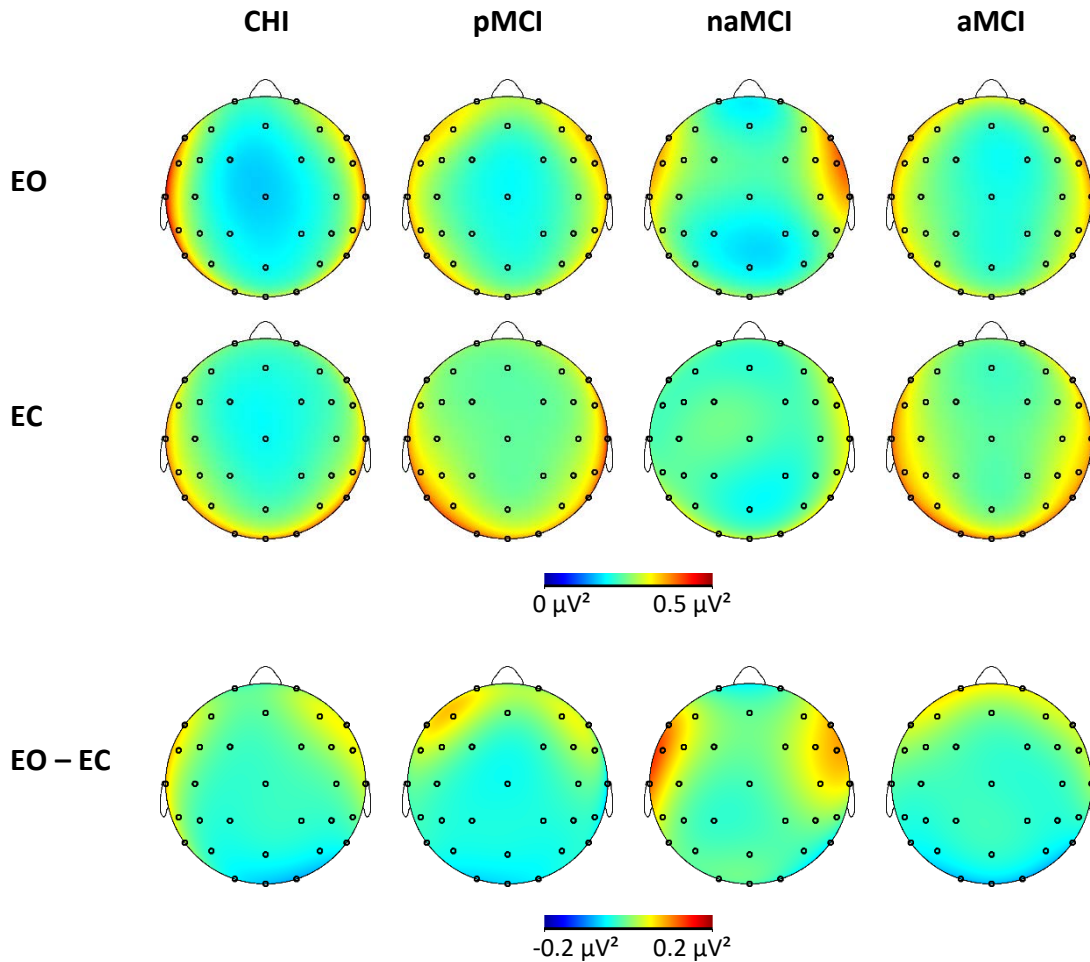

**Supplementary Figure 4.** Brain maps showing the mean absolute power in  $\mu V^2$  (non-transformed) for beta activity (13.5 – 24 Hz) in both conditions and the difference maps separately for each group. CHI = cognitively healthy individuals, pMCI = possible mild cognitive impairments, naMCI = non-amnesic mild cognitive impairments, aMCI = amnesic mild cognitive impairments, EC = eyes closed, EO = eyes open.



**Supplementary Table 5.** Results of the 3 x 3 x 4 (Coronal x Sagittal x Group) mixed ANCOVA for absolute power (log-transformed) at rest with eyes closed (adjusted  $\alpha$ -level = .017).

|           | <i>df</i> | DELTA    |          |            | THETA    |          |            | ALPHA    |          |            | BETA     |          |            |
|-----------|-----------|----------|----------|------------|----------|----------|------------|----------|----------|------------|----------|----------|------------|
|           |           | <i>F</i> | <i>p</i> | $\eta_p^2$ | <i>F</i> | <i>p</i> | $\eta_p^2$ | <i>F</i> | <i>p</i> | $\eta_p^2$ | <i>F</i> | <i>p</i> | $\eta_p^2$ |
| S         | (2,414)   | 206.5    | <.001    | .50        | 196.4    | <.001    | .49        | 299.4    | <.001    | .59        | 106.2    | <.001    | .34        |
| C         | (2,414)   | 133.4    | <.001    | .39        | 73.3     | <.001    | .26        | 152.5    | <.001    | .42        | 13.7     | <.001    | .06        |
| G         | (3,207)   | 0.8      | .47      | .01        | 0.3      | .84      | .00        | 0.8      | .47      | .01        | 0.6      | .61      | .01        |
| S x C     | (4,828)   | 37.5     | <.001    | .15        | 4.5      | .003     | .02        | 34.1     | <.001    | .14        | 4.6      | .002     | .02        |
| S x G     | (6,414)   | 0.8      | .53      | .01        | 1.4      | .22      | .02        | 0.7      | .62      | .01        | 1.4      | .21      | .02        |
| C x G     | (6,414)   | 0.6      | .71      | .01        | 1.4      | .22      | .02        | 1.0      | .41      | .01        | 0.4      | .49      | .01        |
| S x C x G | (12,828)  | 0.7      | .73      | .01        | 1.0      | .41      | .02        | 1.6      | .14      | .02        | 1.3      | .24      | .02        |

*Note.* Uncorrected degrees of freedom are reported. Sex was included as covariate in the analysis. S = Sagittal, C = Coronal, G = Group.

**Supplementary Table 6.** Results of the 3 x 3 x 4 (Coronal x Sagittal x Group) mixed ANCOVA for absolute power (log-transformed) at rest with eyes open (adjusted  $\alpha$ -level = .017).

|           | <i>df</i> | DELTA    |          |            | THETA    |          |            | ALPHA    |          |            | BETA     |          |            |
|-----------|-----------|----------|----------|------------|----------|----------|------------|----------|----------|------------|----------|----------|------------|
|           |           | <i>F</i> | <i>p</i> | $\eta_p^2$ | <i>F</i> | <i>p</i> | $\eta_p^2$ | <i>F</i> | <i>p</i> | $\eta_p^2$ | <i>F</i> | <i>p</i> | $\eta_p^2$ |
| S         | (2,414)   | 124.7    | <.001    | .38        | 136.4    | <.001    | .40        | 318.9    | <.001    | .61        | 117.0    | <.001    | .36        |
| C         | (2,414)   | 44.6     | <.001    | .18        | 47.3     | <.001    | .19        | 50.4     | <.001    | .20        | 0.8      | .43      | .00        |
| G         | (3,207)   | 2.7      | .05      | .04        | 0.9      | .46      | .01        | 0.7      | .55      | .01        | 0.2      | .90      | .00        |
| S x C     | (4,828)   | 9.9      | <.001    | .05        | 6.7      | <.001    | .03        | 19.8     | <.001    | .09        | 3.7      | .01      | .02        |
| S x G     | (6,414)   | 0.8      | .56      | .01        | 0.7      | .63      | .01        | 1.7      | .15      | .02        | 1.3      | .27      | .02        |
| C x G     | (6,414)   | 0.9      | .52      | .01        | 0.0      | .48      | .01        | 1.0      | .42      | .01        | 0.5      | .82      | .01        |
| S x C x G | (12,828)  | 0.9      | .50      | .01        | 1.2      | .28      | .02        | 0.7      | .69      | .01        | 0.8      | .59      | .01        |

*Note.* Uncorrected degrees of freedom are reported. Sex was included as covariate in the analysis. S = Sagittal, C = Coronal, G = Group.

**Supplementary Table 7.** Results of the 3 x 3 x 4 (Coronal x Sagittal x Group) mixed ANCOVA for absolute power reactivity (log EO – log EC; adjusted  $\alpha$ -level = .017).

|           | <i>df</i> | DELTA    |          |            | THETA    |          |            | ALPHA    |          |            | BETA     |          |            |
|-----------|-----------|----------|----------|------------|----------|----------|------------|----------|----------|------------|----------|----------|------------|
|           |           | <i>F</i> | <i>p</i> | $\eta_p^2$ | <i>F</i> | <i>p</i> | $\eta_p^2$ | <i>F</i> | <i>p</i> | $\eta_p^2$ | <i>F</i> | <i>p</i> | $\eta_p^2$ |
| S         | (2,412)   | 2.3      | .10      | .01        | 1.3      | .28      | .01        | 13.3     | <.001    | .06        | 11.8     | <.001    | .05        |
| C         | (2,412)   | 23.7     | <.001    | .10        | 11.4     | <.001    | .05        | 81.0     | <.001    | .28        | 12.7     | <.001    | .06        |
| G         | (3,206)   | 1.2      | .31      | .02        | 1.9      | .13      | .03        | 0.8      | .42      | .01        | 1.7      | .17      | .02        |
| S x C     | (4,824)   | 7.3      | <.001    | .03        | 3.8      | .01      | .02        | 21.7     | <.001    | .10        | 4.0      | .004     | .02        |
| S x G     | (6,412)   | 1.3      | .26      | .02        | 0.5      | .81      | .01        | 1.4      | .23      | .02        | 0.4      | .89      | .01        |
| C x G     | (6,412)   | 0.4      | .89      | .01        | 1.5      | .19      | .02        | 0.6      | .68      | .01        | 0.8      | .56      | .01        |
| S x C x G | (12,824)  | 0.6      | .81      | .01        | 0.6      | .84      | .01        | 1.3      | .26      | .02        | 0.8      | .66      | .01        |

*Note.* Uncorrected degrees of freedom are reported. Sex was included as covariate in the analysis.  
S = Sagittal, C = Coronal, G = Group.

**Supplementary Table 8.** Results of the 3 x 3 x 4 (Coronal x Sagittal x Group) mixed ANCOVA for relative power (log-transformed) at rest with eyes closed (adjusted  $\alpha$ -level = .017).

|           | <i>df</i> | DELTA    |                 |            | THETA    |                 |            | ALPHA    |                 |            | BETA     |                 |            |
|-----------|-----------|----------|-----------------|------------|----------|-----------------|------------|----------|-----------------|------------|----------|-----------------|------------|
|           |           | <i>F</i> | <i>p</i>        | $\eta_p^2$ | <i>F</i> | <i>p</i>        | $\eta_p^2$ | <i>F</i> | <i>p</i>        | $\eta_p^2$ | <i>F</i> | <i>p</i>        | $\eta_p^2$ |
| S         | (2,414)   | 5.9      | <b>.003</b>     | .03        | 15.1     | <b>&lt;.001</b> | .07        | 11.8     | <b>&lt;.001</b> | .05        | 2.2      | .12             | .01        |
| C         | (2,414)   | 138.7    | <b>&lt;.001</b> | .40        | 36.2     | <b>&lt;.001</b> | .15        | 111.7    | <b>&lt;.001</b> | .35        | 81.9     | <b>&lt;.001</b> | .28        |
| G         | (3,207)   | 0.2      | .92             | .00        | 0.4      | .76             | .01        | 0.4      | .75             | .01        | 0.3      | .85             | .00        |
| S x C     | (4,828)   | 73.9     | <b>&lt;.001</b> | .26        | 3.3      | .02             | .02        | 40.9     | <b>&lt;.001</b> | .17        | 8.0      | <b>&lt;.001</b> | .04        |
| S x G     | (6,414)   | 0.7      | .62             | .01        | 0.2      | .97             | .00        | 1.4      | .22             | .02        | 1.4      | .24             | .02        |
| C x G     | (6,414)   | 1.0      | .39             | .02        | 1.1      | .36             | .02        | 1.1      | .36             | .02        | 0.7      | .66             | .01        |
| S x C x G | (12,828)  | 1.0      | .44             | .01        | 1.0      | .43             | .01        | 0.4      | .96             | .01        | 1.7      | .07             | .02        |

*Note.* Uncorrected degrees of freedom are reported. Sex was included as covariate in the analysis. S = Sagittal, C = Coronal, G = Group.

**Supplementary Table 9.** Results of the 3 x 3 x 4 (Coronal x Sagittal x Group) mixed ANCOVA for relative power (log-transformed) at rest with eyes open (adjusted  $\alpha$ -level = .017).

|           | <i>df</i> | DELTA    |                 |            | THETA    |                 |            | ALPHA    |                 |            | BETA     |                 |            |
|-----------|-----------|----------|-----------------|------------|----------|-----------------|------------|----------|-----------------|------------|----------|-----------------|------------|
|           |           | <i>F</i> | <i>p</i>        | $\eta_p^2$ | <i>F</i> | <i>p</i>        | $\eta_p^2$ | <i>F</i> | <i>p</i>        | $\eta_p^2$ | <i>F</i> | <i>p</i>        | $\eta_p^2$ |
| S         | (2,414)   | 5.1      | <b>.01</b>      | .02        | 45.3     | <b>&lt;.001</b> | .18        | 17.      | <b>&lt;.001</b> | .08        | 3.1      | .06             | .02        |
| C         | (2,414)   | 40.7     | <b>&lt;.001</b> | .16        | 19.9     | <b>&lt;.001</b> | .09        | 97.2     | <b>&lt;.001</b> | .32        | 12.8     | <b>&lt;.001</b> | .06        |
| G         | (3,207)   | 0.7      | .55             | .01        | 0.6      | .59             | .01        | 0.8      | .49             | .01        | 0.7      | .54             | .01        |
| S x C     | (4,828)   | 23.7     | <b>&lt;.001</b> | .10        | 22.1     | <b>&lt;.001</b> | .10        | 20.1     | <b>&lt;.001</b> | .09        | 2.1      | .09             | .01        |
| S x G     | (6,414)   | 2.1      | .07             | .03        | 0.1      | .98             | .00        | 0.9      | .46             | .01        | 2.6      | .03             | .04        |
| C x G     | (6,414)   | 0.7      | .63             | .01        | 0.3      | .94             | .00        | 1.5      | .19             | .02        | 0.5      | .78             | .01        |
| S x C x G | (12,828)  | 1.6      | .09             | .02        | 0.6      | .81             | .01        | 0.9      | .55             | .01        | 0.9      | .49             | .01        |

*Note.* Uncorrected degrees of freedom are reported. Sex was included as covariate in the analysis. S = Sagittal, C = Coronal, G = Group.

**Supplementary Table 10.** Results of the 3 x 3 x 4 (Coronal x Sagittal x Group) mixed ANCOVA for relative power reactivity (log EO – log EC; adjusted  $\alpha$ -level = .017).

|           | <i>df</i> | DELTA    |          |            | THETA    |          |            | ALPHA    |          |            | BETA     |          |            |
|-----------|-----------|----------|----------|------------|----------|----------|------------|----------|----------|------------|----------|----------|------------|
|           |           | <i>F</i> | <i>p</i> | $\eta_p^2$ | <i>F</i> | <i>p</i> | $\eta_p^2$ | <i>F</i> | <i>p</i> | $\eta_p^2$ | <i>F</i> | <i>p</i> | $\eta_p^2$ |
| S         | (2,412)   | 24.3     | <.001    | .11        | 12.6     | <.001    | .06        | 3.7      | .03      | .02        | 15.2     | <.001    | .07        |
| C         | (2,412)   | 62.8     | <.001    | .23        | 36.1     | <.001    | .15        | 21.0     | <.001    | .09        | 50.3     | <.001    | .20        |
| G         | (3,206)   | 0.5      | .68      | .01        | 0.7      | .54      | .01        | 0.8      | .50      | .01        | 0.7      | .54      | .01        |
| S x C     | (4,824)   | 20.0     | <.001    | .09        | 13.2     | <.001    | .06        | 5.9      | <.001    | .03        | 3.2      | .02      | .02        |
| S x G     | (6,412)   | 1.3      | .26      | .02        | 0.4      | .84      | .01        | 2.8      | .02      | .04        | 0.7      | .65      | .01        |
| C x G     | (6,412)   | 0.5      | .79      | .01        | 0.7      | .65      | .01        | 1.0      | .42      | .01        | 0.9      | .47      | .01        |
| S x C x G | (12,824)  | 0.5      | .88      | .01        | 0.6      | .77      | .01        | 0.4      | .92      | .01        | 0.7      | .71      | .01        |

*Note.* Uncorrected degrees of freedom are reported. Sex was included as covariate in the analysis. S = Sagittal, C = Coronal, G = Group.

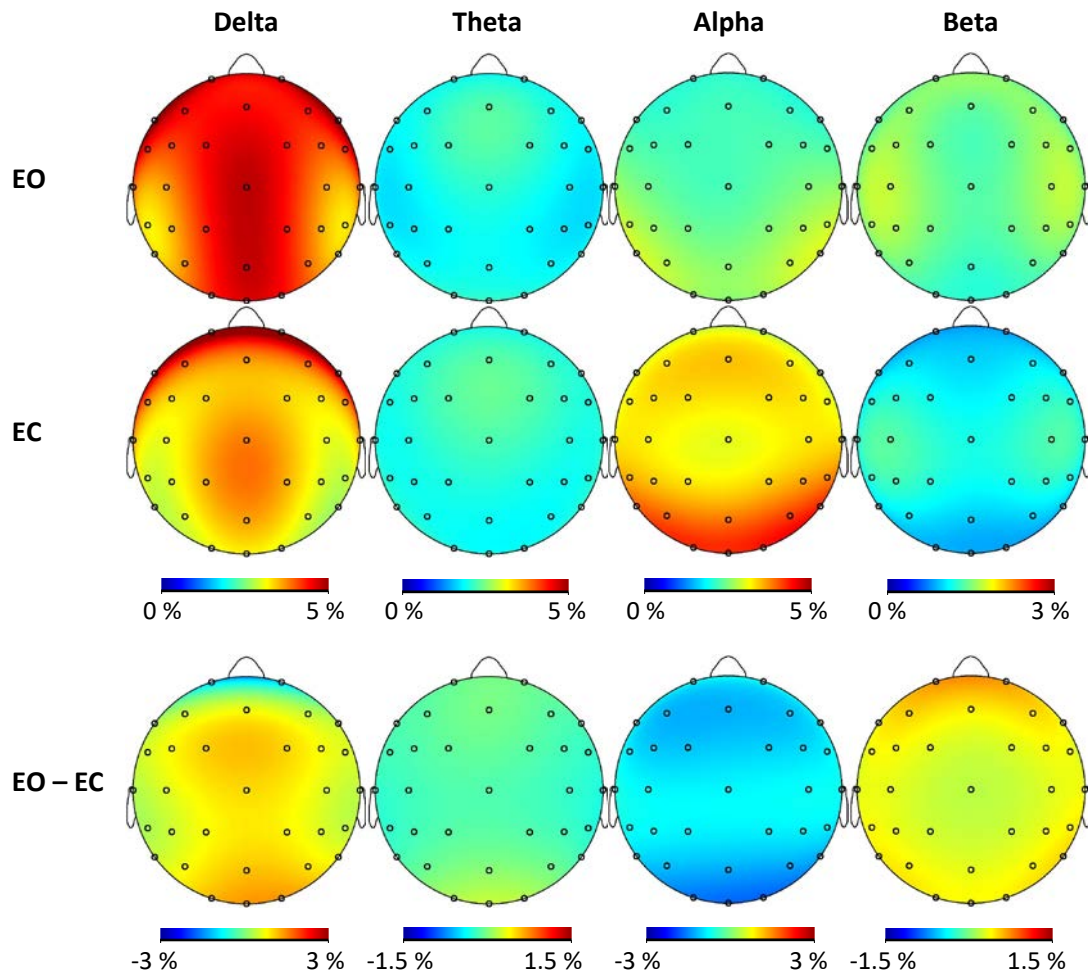

**Supplementary Figure 5.** Brain maps showing the mean relative power in % for all frequency bands in both conditions and the difference maps. EO = eyes open, EC = eyes closed

**Supplementary Table 11.** Results of the contrast analysis in each frequency band for relative power (log-transformed) at rest with eyes closed.

|                                                | DELTA      |                 |            | THETA       |                 |            | ALPHA        |                 |            | BETA         |                 |            |
|------------------------------------------------|------------|-----------------|------------|-------------|-----------------|------------|--------------|-----------------|------------|--------------|-----------------|------------|
|                                                | <i>F</i>   | <i>p</i>        | $\eta_p^2$ | <i>F</i>    | <i>p</i>        | $\eta_p^2$ | <i>F</i>     | <i>p</i>        | $\eta_p^2$ | <i>F</i>     | <i>p</i>        | $\eta_p^2$ |
| Main Effects<br>(adj. $\alpha$ -level = .025)  |            |                 |            |             |                 |            |              |                 |            |              |                 |            |
| L > R                                          | 7.4        | <b>.01</b>      | .04        | 3.1         | .08             | .02        | <u>4.5</u>   | <u>.04</u>      | <u>.02</u> |              |                 |            |
| L/R > M                                        | 5.5        | <b>.02</b>      | .03        | <u>18.5</u> | <b>&lt;.001</b> | <u>.08</u> | 13.9         | <b>&lt;.001</b> | .06        |              |                 |            |
| F > P                                          | 325.2      | <b>&lt;.001</b> | .61        | 94.4        | <b>&lt;.001</b> | .31        | <u>305.6</u> | <b>&lt;.001</b> | <u>.60</u> | <u>0.1</u>   | <u>.80</u>      | <u>.00</u> |
| F/P > C                                        | 8.7        | <b>.004</b>     | .04        | <u>1.4</u>  | <u>.24</u>      | <u>.01</u> | 20.3         | <b>&lt;.001</b> | .09        | <u>161.2</u> | <b>&lt;.001</b> | <u>.44</u> |
| Interactions<br>(adj. $\alpha$ -level = .0125) |            |                 |            |             |                 |            |              |                 |            |              |                 |            |
| L > R x F > P                                  | <u>0.0</u> | <u>.87</u>      | <u>.00</u> |             |                 |            | 8.5          | <b>.004</b>     | .08        | <u>23.0</u>  | <b>&lt;.001</b> | <u>.10</u> |
| L > R x F/P > C                                | <u>1.1</u> | <u>.30</u>      | <u>.01</u> |             |                 |            | 0.0          | .99             | .00        | 0.9          | .33             | .01        |
| L/R > M x F > P                                | 168.9      | <b>&lt;.001</b> | .45        |             |                 |            | <u>84.8</u>  | <b>&lt;.001</b> | <u>.29</u> | <u>0.4</u>   | <u>.55</u>      | <u>.00</u> |
| L/R > M x F/P > C                              | 18.6       | <b>&lt;.001</b> | .08        |             |                 |            | <u>17.2</u>  | <b>&lt;.001</b> | <u>.08</u> | <u>14.2</u>  | <b>&lt;.001</b> | <u>.06</u> |

*Note.* All test statistics are with (1, 207) degrees of freedom. Underlined effects are reversed in direction (i.e., the reversed effect from L > R x F > P is L < R x F > P). Changing the direction of both directional indicators within a single effect is equivalent (i.e., L > R x F > P is the same as L < R x F < P). L = left, R = right, M = midline, F = frontal, P = posterior, C = central.

**Supplementary Table 12.** Results of the contrast analysis in each frequency band for relative power (log-transformed) at rest with eyes open.

|                                                | DELTA      |                 |            | THETA       |                 |            | ALPHA        |                 |            | BETA        |                 |            |
|------------------------------------------------|------------|-----------------|------------|-------------|-----------------|------------|--------------|-----------------|------------|-------------|-----------------|------------|
|                                                | <i>F</i>   | <i>p</i>        | $\eta_p^2$ | <i>F</i>    | <i>p</i>        | $\eta_p^2$ | <i>F</i>     | <i>p</i>        | $\eta_p^2$ | <i>F</i>    | <i>p</i>        | $\eta_p^2$ |
| Main Effects<br>(adj. $\alpha$ -level = .025)  |            |                 |            |             |                 |            |              |                 |            |             |                 |            |
| L > R                                          | <u>0.7</u> | <u>.39</u>      | <u>.00</u> | <u>0.4</u>  | <u>.54</u>      | <u>.00</u> | 0.4          | .52             | .00        |             |                 |            |
| L/R > M                                        | <u>6.4</u> | <b>.01</b>      | <u>.03</u> | <u>57.4</u> | <b>&lt;.001</b> | <u>.22</u> | 22.1         | <b>&lt;.001</b> | .10        |             |                 |            |
| F > P                                          | 51.7       | <b>&lt;.001</b> | .20        | 10.5        | <b>.001</b>     | .05        | <u>190.8</u> | <b>&lt;.001</b> | <u>.48</u> | 0.9         | .35             | .00        |
| F/P > C                                        | 28.1       | <b>&lt;.001</b> | .12        | 28.5        | <b>&lt;.001</b> | .12        | <u>1.6</u>   | <u>.20</u>      | <u>.01</u> | <u>30.7</u> | <b>&lt;.001</b> | <u>.13</u> |
| Interactions<br>(adj. $\alpha$ -level = .0125) |            |                 |            |             |                 |            |              |                 |            |             |                 |            |
| L > R x F > P                                  | 5.0        | .39             | .00        | <u>0.9</u>  | <u>.34</u>      | <u>.00</u> | 2.6          | .11             | .01        |             |                 |            |
| L > R x F/P > C                                | <u>3.1</u> | <u>.08</u>      | <u>.02</u> | 1.3         | .26             | .01        | 1.0          | .33             | .01        |             |                 |            |
| L/R > M x F > P                                | 46.5       | <b>&lt;.001</b> | .18        | <u>42.8</u> | <b>&lt;.001</b> | <u>.17</u> | <u>30.6</u>  | <b>&lt;.001</b> | <u>.13</u> |             |                 |            |
| L/R > M x F/P > C                              | 17.7       | <b>&lt;.001</b> | .08        | 15.4        | <b>&lt;.001</b> | .07        | <u>25.4</u>  | <b>&lt;.001</b> | <u>.11</u> |             |                 |            |

*Note.* All test statistics are with (1, 207) degrees of freedom. Underlined effects are reversed in direction (i.e., the reversed effect from L > R x F > P is L < R x F > P). Changing the direction of both directional indicators within a single effect is equivalent (i.e., L > R x F > P is the same as L < R x F < P). L = left, R = right, M = midline, F = frontal, P = posterior, C = central.

**Supplementary Table 13.** Results of the contrast analysis in each frequency band for reactivity (difference of relative power).

|                   | DELTA |                 |            | THETA |                 |            | ALPHA |                 |            | BETA |                 |            |
|-------------------|-------|-----------------|------------|-------|-----------------|------------|-------|-----------------|------------|------|-----------------|------------|
|                   | F     | p               | $\eta_p^2$ | F     | p               | $\eta_p^2$ | F     | p               | $\eta_p^2$ | F    | p               | $\eta_p^2$ |
| Main Effects      |       |                 |            |       |                 |            |       |                 |            |      |                 |            |
| L > R             | 14.0  | <u>&lt;.001</u> | .06        | 4.8   | .03             | .02        |       |                 |            | 0.5  | .46             | .00        |
| L/R > M           | 27.5  | <u>&lt;.001</u> | .12        | 16.1  | <u>&lt;.001</u> | .07        |       |                 |            | 20.7 | <u>&lt;.001</u> | .09        |
| F > P             | 137.0 | <u>&lt;.001</u> | .40        | 39.9  | <u>&lt;.001</u> | .16        | 3.9   | .05             | .02        | 1.9  | .17             | .01        |
| F/P > C           | 0.9   | .35             | .00        | 33.7  | <u>&lt;.001</u> | .14        | 33.6  | <u>&lt;.001</u> | .14        | 84.2 | <u>&lt;.001</u> | .29        |
| Interactions      |       |                 |            |       |                 |            |       |                 |            |      |                 |            |
| L > R x F > P     | 4.5   | .04             | .02        | 1.0   | .32             | .01        | 0.8   | .36             | .00        |      |                 |            |
| L > R x F/P > C   | 0.5   | .47             | .00        | 5.4   | .02             | .03        | 0.8   | .38             | .00        |      |                 |            |
| L/R > M x F > P   | 48.9  | <u>&lt;.001</u> | .19        | 25.6  | <u>&lt;.001</u> | .11        | 13.3  | <u>&lt;.001</u> | .06        |      |                 |            |
| L/R > M x F/P > C | 0.0   | .83             | .00        | 5.7   | .02             | .03        | 0.7   | <u>.42</u>      | .00        |      |                 |            |

Note. All test statistics are with (1, 206) degrees of freedom. Underlined effects are reversed in direction (i.e., the reversed effect from L > R x F < P is L < R x F < P). Changing the direction of both directional indicators within a single effect is equivalent (i.e., L > R x F < P is the same as L < R x F > P). L = left, R = right, M = midline, F = frontal, P = posterior, C = central.

**Supplementary Table 14.** Mean (SD) of absolute reactivity values (log EO – log EC) for the whole sample (N = 211).

|   | DELTA           |                 |                 | THETA           |                 |                 | ALPHA           |                 |                 | BETA                         |                 |                              |
|---|-----------------|-----------------|-----------------|-----------------|-----------------|-----------------|-----------------|-----------------|-----------------|------------------------------|-----------------|------------------------------|
|   | L               | M               | R               | L               | M               | R               | L               | M               | R               | L                            | M               | R                            |
| F | -0.24<br>(0.40) | -0.08<br>(0.26) | -0.24<br>(0.39) | -0.21<br>(0.23) | -0.16<br>(0.20) | -0.20<br>(0.23) | -0.35<br>(0.26) | -0.41<br>(0.31) | -0.34<br>(0.26) | <b>0.02</b><br><b>(0.18)</b> | -0.05<br>(0.10) | <b>0.01</b><br><b>(0.20)</b> |
| C | -0.03<br>(0.21) | -0.04<br>(0.22) | -0.07<br>(0.21) | -0.11<br>(0.14) | -0.15<br>(0.17) | -0.14<br>(0.20) | -0.19<br>(0.17) | -0.31<br>(0.25) | -0.22<br>(0.20) | <b>0.01</b><br><b>(0.20)</b> | -0.09<br>(0.12) | <b>0.01</b><br><b>(0.22)</b> |
| P | -0.07<br>(0.21) | -0.07<br>(0.21) | -0.08<br>(0.21) | -0.18<br>(0.21) | -0.17<br>(0.21) | -0.21<br>(0.23) | -0.43<br>(0.33) | -0.43<br>(0.34) | -0.50<br>(0.35) | -0.04<br>(0.13)              | -0.08<br>(0.13) | -0.06<br>(0.14)              |

Note. Positive values are printed in bold and indicate an increase in power from EC to EO. F = frontal, C = central, P = posterior, L = left, M = mid, R = right.
